# Supplementary material
Source: publisher figshare collection journal article supplement (https://acs.figshare.com/ndownloader/files/14199425)
Supplement: Supplementary file 1 [file 14199425]

## **Supporting Information**

### **A Quasi-Solid-State Solar Rechargeable Battery with Polyethylene Oxide Gel Electrolyte**

Bao Lei, Guo-Ran Li, Peng Chen, Xue-Ping Gao\*

*Institute of New Energy Material Chemistry, School of Materials Science and Engineering,  
Nankai University, Tianjin 300350, China.*

\* E-mail: [xpgao@nankai.edu.cn](mailto:xpgao@nankai.edu.cn). Tel/Fax: +86-22-23500876.

## Experimental section

### 1. Pre-treatment of Nafion membrane

Before experiments, the Nafion membrane was pretreated. Briefly, the Nafion 117 membrane was immersed in  $\text{H}_2\text{O}_2$  (5 %) and  $\text{H}_2\text{SO}_4$  solution ( $1 \text{ mol L}^{-1}$ ) and boiled for 1 h, respectively.<sup>1</sup> After immersing in boiling de-ionized water for several times to remove the sulfuric acid, the cleaned membrane was treated in boiling water containing  $\text{LiClO}_4$  ( $1 \text{ mol L}^{-1}$ ) till to the pH=7 to exchange  $\text{H}^+$ . Followed by rinsed with absolute ethanol, the pretreated Nafion 117 membrane was stored in the mixed solution of propylene carbonate (PC) and ethylene carbonate (EC) with volume ratio of 1:1.

### 2. Preparation of the photo-anode and counter electrode

The N719 sensitized  $\text{TiO}_2$  photo-anode film was prepared as following. A  $\text{TiO}_2$  film was coated on FTO (F-doped  $\text{SnO}_2$ ) conductive glass by a typical doctor-blade method, and then sintered in muffle furnace at  $500 \text{ }^\circ\text{C}$  for 1 h with a heating rate of  $10 \text{ }^\circ\text{C min}^{-1}$ . After cooling to room temperature naturally, the resulting  $\text{TiO}_2$  film was immersed in N719 dye (ethanol solution,  $40 \text{ mmol L}^{-1}$ ) for 12 h in the dark. When further rinsed with absolute ethanol and dried by a hair drier, the dye-sensitized  $\text{TiO}_2$  photo-anode was finally obtained. The effective area of the  $\text{TiO}_2$  photo-anode was  $1 \text{ cm}^2$ . The 9,10-anthraquinone (AQ) was mixed with multi-walled carbon nanotubes (MWCNTs), carboxymethyl cellulose sodium (CMC, 10 wt. %) aqueous solution with the mass ratio of 8:1:1. The mixture was ground to form a paste, which was coated on clean nickel foam by the doctor-blade method. After drying and pressing under 30 MPa, the bi-functional electrode was prepared as a counter electrode in DSSCs and an energy storage anode in secondary battery.

### 3. Preparation of gel electrolyte

$\text{LiClO}_4$  (1.064 g) was added to the mixed solvent of EC (5 mL) and PC (5 mL). And then, PEO (average  $M_w=100000$ ) was added to the solution to form a gel electrolyte, the obtained gel electrolyte was worked as anode electrolyte directly. The cathode electrolyte contained 4-tert-butylpyridine (TBP,  $0.5 \text{ mol L}^{-1}$ ) in the as-prepared gel electrolyte.

### 4. Fabrication of the solar rechargeable battery

The solar rechargeable battery with sandwich construction was assembled by stacking the dye-sensitized  $\text{TiO}_2$  photo-anode, LiI cathode, Nafion membrane separator and counter electrode/anode in order. The spaces between electrodes and separator were full of the as-prepared cathode and anode gel electrolytes with an injector.

### 5. Electrochemical measurements

In cyclic voltammograms (CVs) of LiI cathode, N179 dye and 9,10-anthraquinone (AQ) anode, a conventional three-electrode system with metal Pt counter electrode and  $\text{Ag}/\text{Ag}^+$  reference electrode was carried out on a IM6ex (Zahner) electrochemical workstation. The CV test of LiI cathode with a scan rate of  $50 \text{ mV s}^{-1}$  was conducted using a mirror-like Pt/FTO as working electrode in gel electrolyte containing LiI ( $0.1 \text{ mol L}^{-1}$ ). The CV measurement of N719 dye was performed using adsorbed N719 dye FTO conductive glass as working electrode with a scan rate of  $100 \text{ mV s}^{-1}$ . The CV test of AQ was operated in gel electrolyte with a scan rate of  $50 \text{ mV s}^{-1}$ . Electrochemical impedance spectra (EIS) were measured on a IM6ex (Zahner) electrochemical workstation using a symmetric cell with two identical FTO conductive glass electrodes from 100 kHz to 100 mHz with an amplitude voltage of 5 mV. The ion conductivity ( $\sigma$ ) of the gel electrolyte was calculated from the EIS results. The photo-charge and electrochemical

constant-current discharge measurements of the solar rechargeable battery was checked on a LAND-CT2001A instrument with an assistant illumination by a sunlight simulator (Oriel Sol 2A, Newport) under  $100 \text{ mW cm}^{-2}$  irradiation in the photo-charge process.

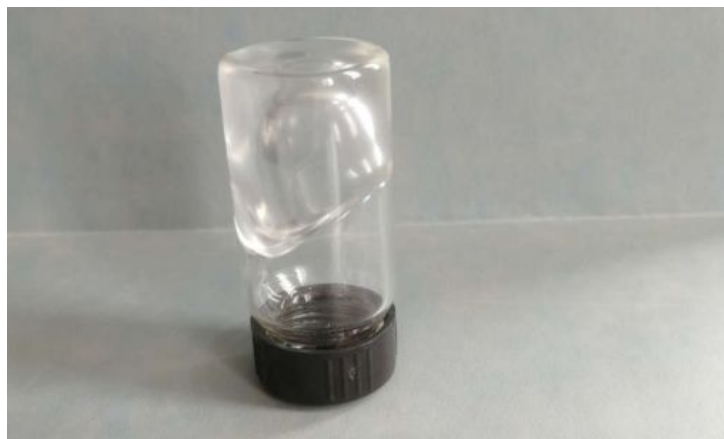

**Fig. S1.** Photo of the as-prepared quasi-solid-state gel electrolyte.

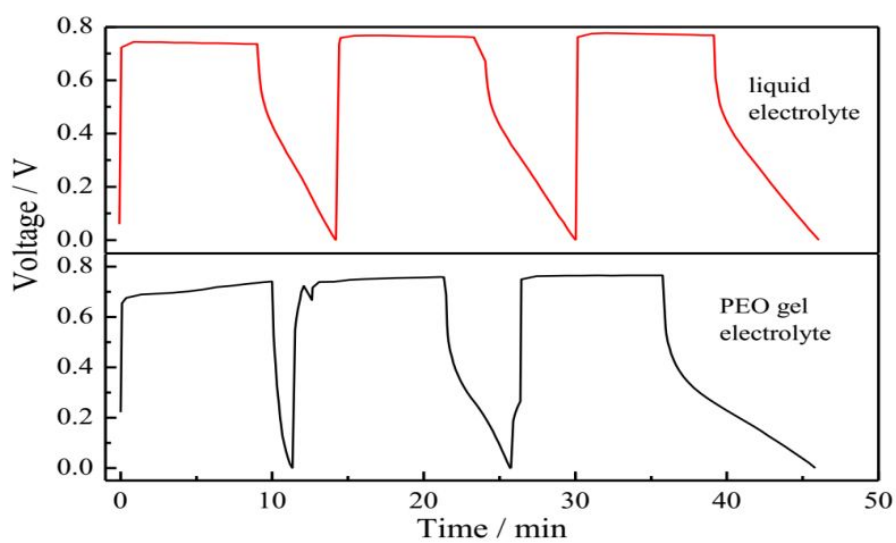

**Fig. S2** Typical charge-discharge curves in initial 3 cycles of the solar rechargeable battery with liquid and PEO gel electrolytes.

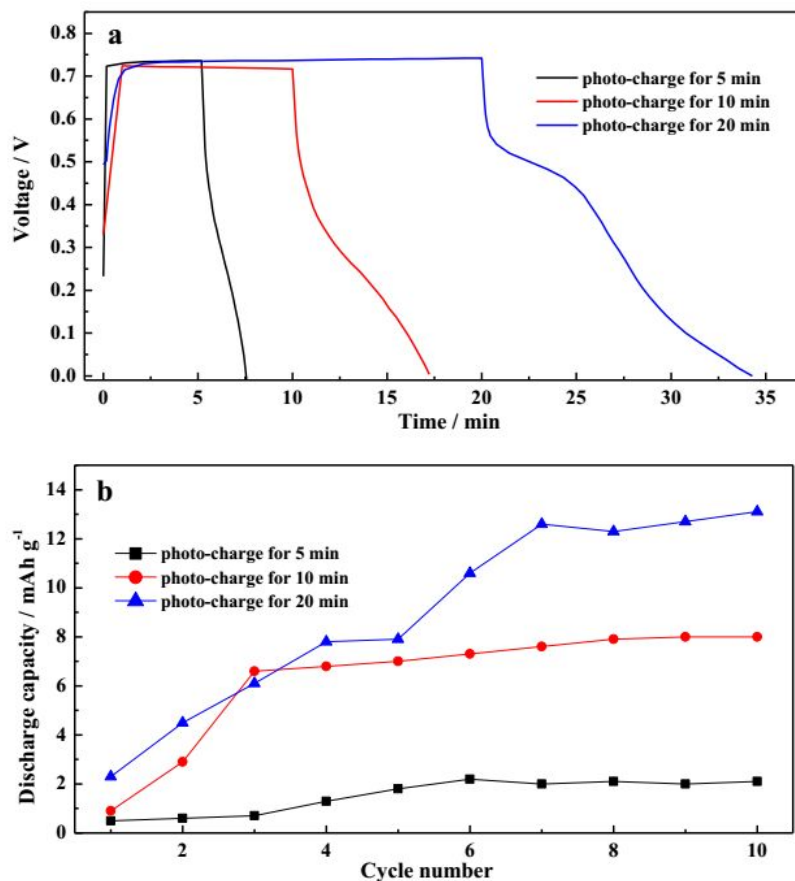

**Fig.S3.**(a) Voltage profiles of the solar rechargeable battery with PEO gel electrolyte in different photo-charging time under  $100 \text{ mW cm}^{-2}$  irradiation, and discharging at a discharge current density of  $4 \text{ mA g}^{-1}$  in the dark. (b) Discharge capacity vs. cycle number during 10 cycles.

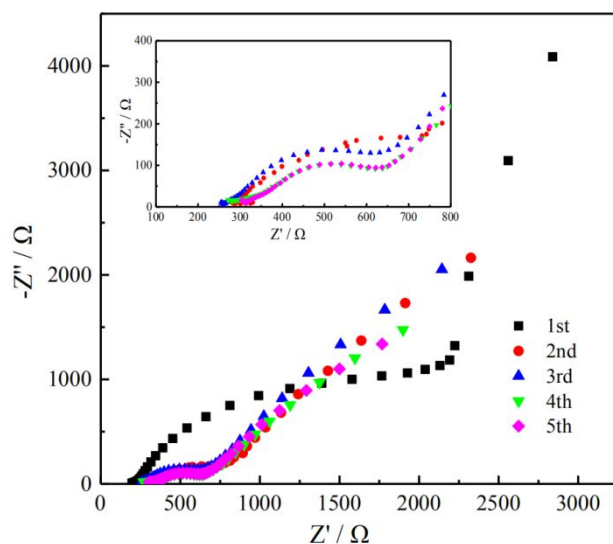

**Fig.S4**Nyquist plots of the solar rechargeable battery photo-charged for 10 min in the frequency range from 100 kHz to 10 mHz.

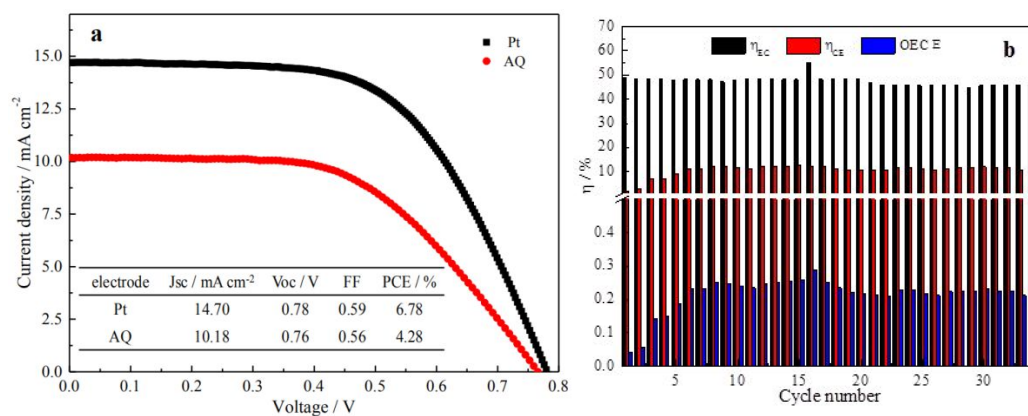

**Fig. S5(a)**  $J$ - $V$  curves of the dye-sensitized solar cells with AQ and Pt counter electrodes under irradiation ( $100 \text{ mW cm}^{-2}$ ). **(b)**  $\eta_{CE}$ ,  $\eta_{EC}$  and  $OECE$  of the solar rechargeable battery with 7.5 wt % PEO gel electrolyte at the discharge current density of  $4 \text{ mA g}^{-1}$  in the dark after photo-charging for 10 min.

## References

1. Li, L.; Drillet, J. F.; Dittmeyer, R.; Juttner, K. Formation and Characterization of PEDOT-Modified Nafion 117 Membranes. *J. Solid State Electrochem.* **2006**, *10*, 708-713.
